# Supplementary material for: GNTI-122: an autologous antigen-specific engineered Treg cell therapy for type 1 diabetes
Source: PubMed Central journal article supplement (PMC11063937; doi:10.1172/jci.insight.171844), 2024-03-22
Supplement: jciinsight-9-171844-s263.pdf [file jciinsight-9-171844-s263.pdf]

## Supplemental Material

### Supplemental Methods

#### *Generation of EngTregs used for stability studies*

CD4<sup>+</sup> cells were isolated via magnetic enrichment from PBMCs. The cells were then genetically modified using CRISPR-Cas9 to target and knock-in at the *FOXP3* locus transgenes delivered by adeno-associated virus (AAV) vectors carrying the MND promoter driving the expression of chemically inducible signaling complex (CISC) and endogenous FOXP3. CISC receptor enables selective expansion and enrichment of engineered Tregs in the presence of rapamycin. The expanded cells were cryopreserved and used for further analyses and studies.

#### *Isolation and expansion of human Tregs (cultured Tregs [cTregs])*

For cTregs, CD4<sup>+</sup> CD25<sup>+</sup> CD127<sup>lo</sup> cells were isolated from PBMCs via flow cytometric cell sorting (BD Symphony by BD Biosciences). The cells were then activated using anti-CD3/CD28 Dynabeads (3:1; Thermo Fisher) for an initial expansion, before rest to match EngTreg protocol timelines. IL-2 (100 ng/mL) was supplemented to cTregs throughout and were stimulated again at Day 7 by CD3/CD28 beads (3:1). Expanded cells were cryopreserved and used for further analyses and studies described below.

#### *RNA-Seq library preparation and sequencing*

Cells were double-sorted by flow cytometry into TCL buffer (Qiagen) containing 1% 2-mercaptoethanol (Sigma) as previously described (1), and samples were processed by Azenta/Genewiz. Briefly, SMART-Seq v4 Ultra Low Input Kit for Sequencing was used for full-length cDNA synthesis and amplification (Clontech), and Illumina Nextera XT library was used for sequencing library preparation. Briefly, cDNA was fragmented, and adaptor was added using transposase, followed by limited-cycle PCR to enrich and add index to the cDNA fragments. The final library was assessed with Agilent TapeStation.

The sequencing libraries were multiplexed and clustered on lane(s) of a flowcell. After clustering, the flowcell was loaded on the Illumina HiSeq instrument according to manufacturer's instructions. The samples were sequenced using a 2 × 150 paired-end configuration. Image analysis and base calling were conducted by the HiSeq Control Software. Raw sequence data (bcl files) generated from Illumina HiSeq were converted into fastq files and de-multiplexed using Illumina's bcl2fastq 2.17 software. One mismatch was allowed for index sequence identification.

Following library preparation, reads were aligned using STAR (2). The gene-level quantification was calculated by Salmon (3) feature counts (<http://subread.sourceforge.net/>) and raw read counts tables were normalized by median of ratios method with DESeq2 package from Bioconductor and converted to Gene Pattern gct and cls format. Poor quality samples with less than 3 million uniquely mapped reads were excluded from normalization and normalized read counts were filtered for expression (>10) to avoid background confounders. After normalization, reads were further filtered by minimal expression in Multiplot Studio (GenePattern; Broad Institute). All signature gene sets are referenced in the corresponding figure legends. Heat maps were generated with Morpheus (<https://software.broadinstitute.org/morpheus>), typically using log<sub>2</sub>-transformed FoldChange relative to

mean of controls. The CoreTreg gene signature (4) used for analysis included FOXP3, IL2RA, IL2RB, IKZF2, TNFRSF1B.

#### *Proinflammatory challenge culture conditions*

$2 \times 10^5$  EngTregs and cTregs were cultured in 96-well plates in RPMI + 20% FBS with or without  $\alpha$ CD3/CD28 Dynabeads (1:1 ratio), IL-2 (50 ng/mL), a cocktail of IL-6 (50 ng/mL), TNF $\alpha$  (50 ng/mL), and IL-12 (10 ng/mL) with or without rapamycin (10 nM) for 72 hours prior to flow cytometric analysis.

#### *Pathogen-derived peptide sequences*

Pathogen-derived peptide sequences were selected using a multistep screening approach. First, the islet-specific glucose-6-phosphatase catalytic subunit-related protein (IGRP) (305-324) minimal epitope 'FLQIPTHEE' was queried against peptides from pathogenic species with known risks to humans by protein BLAST using the non-redundant protein sequence database, yielding 298 pathogenic sequences with  $\leq 3$  amino acid mismatches

([https://blast.ncbi.nlm.nih.gov/Blast.cgi?PROGRAM=blastp&PAGE\\_TYPE=BlastSearch&LINK\\_LOC=blasthome](https://blast.ncbi.nlm.nih.gov/Blast.cgi?PROGRAM=blastp&PAGE_TYPE=BlastSearch&LINK_LOC=blasthome), accessed 08/2021). These homologous pathogenic peptides were then assigned a relative binding score (RBA) to DRB1\*04:01 using a previously published algorithm (5). All peptides with a predicted RBA above 0.0498, one-tenth the IGRP minimal epitope binding score (RBA = 0.498), were selected as potential DRB1\*04:01 binders. In total, 67 unique peptides met this cutoff and were then evaluated to assess the similarity of their T-cell receptor (TCR) contact residues to the IGRP 305-324 peptide. Based on crystal structures of peptide/HLA-DR and peptide/HLA-DR/TCR complexes, residues at positions p1, p2, p3, p5, p8, and p10 that flank or are within the minimal epitope HFLQIPTHEEH were considered potential TCR contact residues (6). The BLOSUM-62 matrix was then used to evaluate the similarity of the residues at the potential TCR contact sites in the selected peptides compared to the corresponding residues in HFLQIPTHEEH. The default BLOSUM-62 matrix was modified based on the tolerated residue substitutions observed in the alanine scanning experiment to generate a custom TCR recognition matrix for each potential contact residue and combined these values to calculate a TCR recognition score for each of the 67 peptides. Finally, to produce a refined list of potentially cross-reactive sequences, an aggregate score was generated by multiplying the DRB1\*0401 binding score and TCR recognition score. Peptides with a score above the median aggregate score of 3.6 were chosen for further analysis, resulting in 13 predicted epitopes from human pathogens that were tested for cross-recognition using a CD137 upregulation assay (see results in **Figure 4B**).

#### *TCR selection*

TCR selection was performed using previously published methods (5). Briefly, TCRs derived from clonally expanded CD4<sup>+</sup> cells were isolated from patients with T1D. Candidate TCRs were engineered into Tregs, referred to as EngTregs. These EngTreg candidates expressing a human TCR were then evaluated using a panel of assays to select a final TCR for inclusion in the GNTI-122 cells. These assays include direct and bystander suppression and avidity.

#### *Cell characterization and phenotypic profiling*

Cells were first stained with LIVE/DEAD Fixable Aqua (Invitrogen) for 30 minutes at 4 °C and then stained for 20 minutes at 4 °C with the corresponding surface antibodies. The cells were then washed, fixed, and

permeabilized (eBioscience™ Fcγ3 / Transcription Factor Staining Buffer Set) for 45 minutes at room temperature before proceeding with the intracellular staining for 1 hour at room temperature. After the incubation, the cells were washed and resuspended in PBS for acquisition.

#### *GNTI-122 engraftment*

Eight- to 10-week-old female NSG mice were randomized into treatment groups based on body weight. Starting on Day 1, rapamycin was administered intraperitoneally once every other day for the duration of 17 days. On Day 3, the mice received whole-body irradiation (200 cGy) to promote the initial engraftment of GNTI-122 in a mouse host, followed by GNTI-122 administration 2 hours later. Half of the animals per group were euthanized on Day 19, 48 hours after the last rapamycin dose, and the second half on Day 31, 14 days after completion of rapamycin treatment. Persistence of GNTI-122 was assessed by flow cytometry in blood, spleen, bone marrow, and liver (**Supplemental Figure 6A**).

## Supplemental Figures

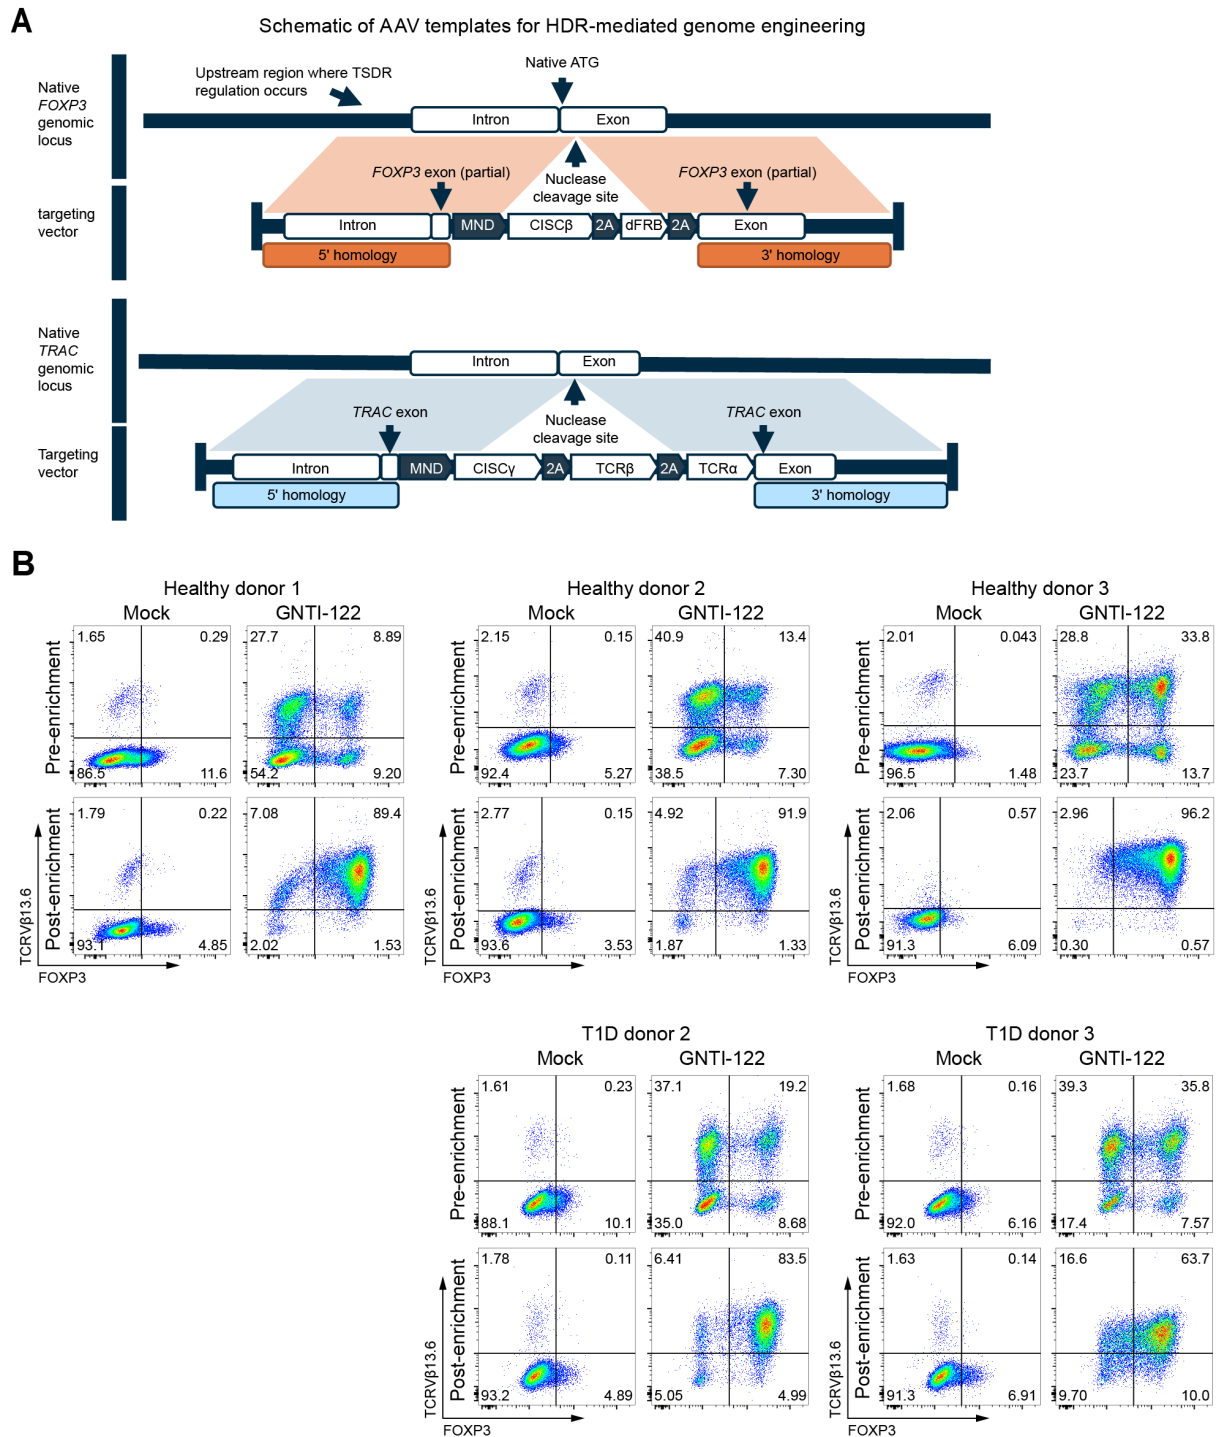

**Supplemental Figure 1. (A)** Schematic of AAV templates and associated CRISPR/Cas9 target cleavage site for HDR-mediated targeted integration of transgenes for GNTI-122. **(B)** FACS analysis of GNTI-122 and Mock cells generated from healthy donors (HDs) and patients with type 1 diabetes (T1D) (T1D Donor 1 in Figure 1D). AAV, adeno-associated virus; HDR, homology-directed repair; TSDR, Treg-specific demethylated region; ATG, start codon.

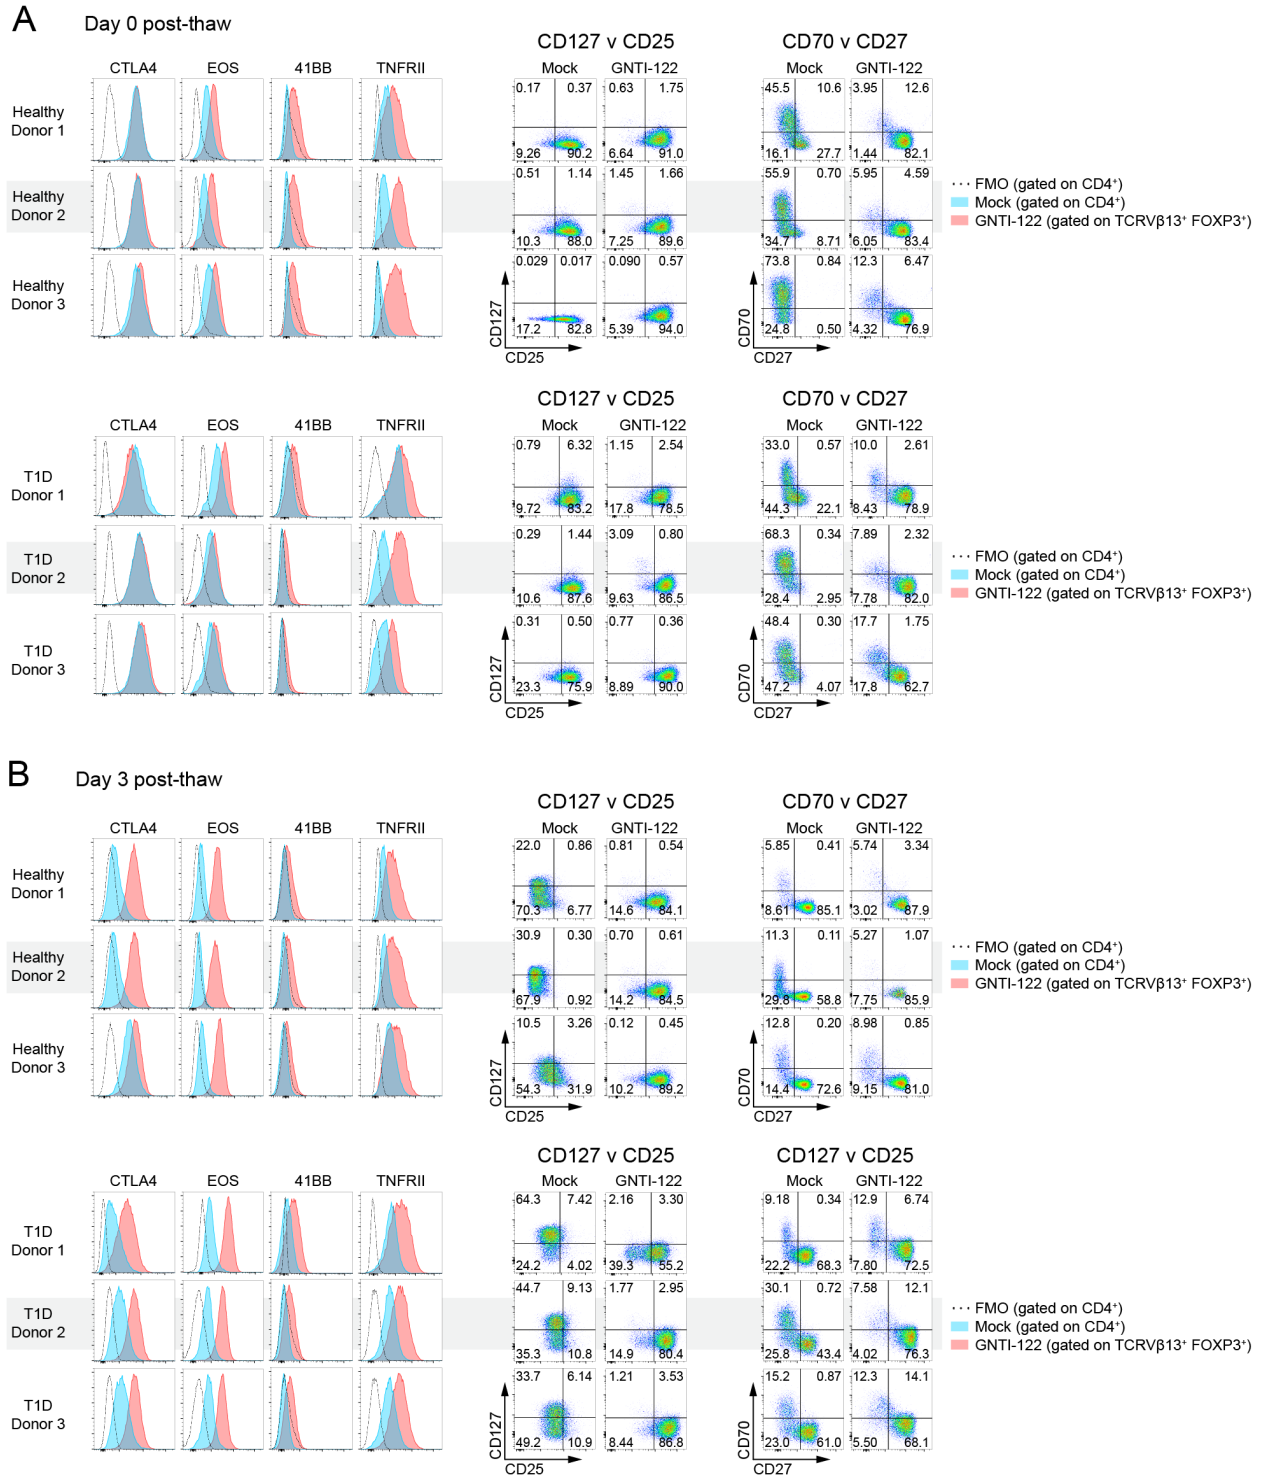

**Supplemental Figure 2.** Flow cytometry plots of all healthy donor (HD) and type 1 diabetes (T1D) patient donor-derived mock engineered (Mock) and GNTI-122, immediately after thaw and after 3 days of rest in low IL-2 culture. FMO, fluorescence minus one

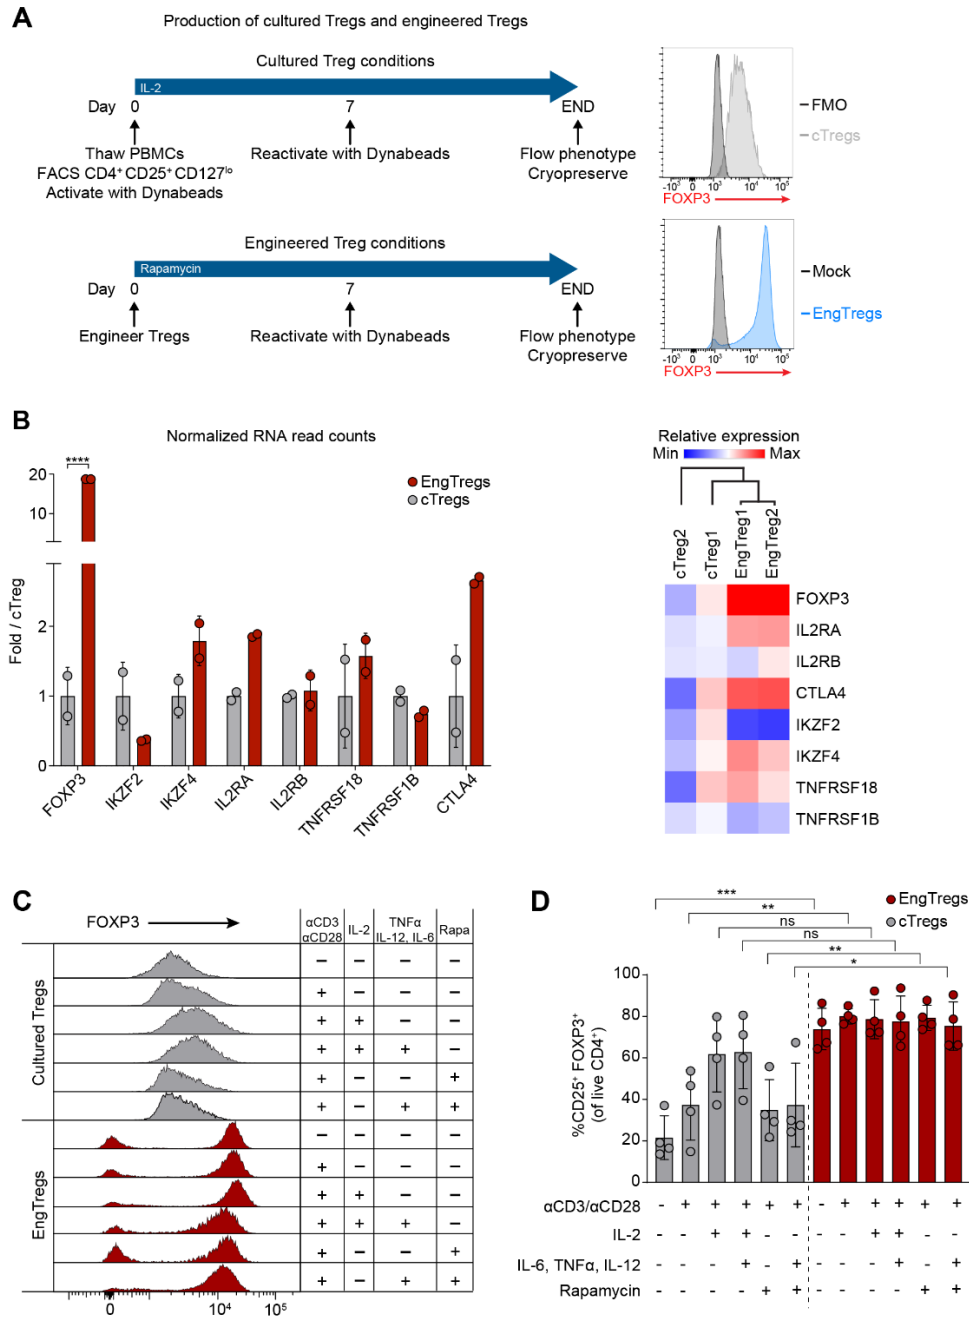

**Supplemental Figure 3. (A)** Schematic diagram of cultured Treg (cTreg) and engineered Treg (EngTreg) production process with representative flow plots of the resulting cells' FOXP3 expression levels. **(B)** Graph and heat map of gene expression comparison between donor matched EngTregs and cTregs generated from 2 independent donors reveal that typical Treg transcripts such as CTLA4, IKZF4 (EOS), IL2RA, and TNFRSF18 are not significantly different, while FOXP3 transcript is significantly higher ( $n=2$ , mean  $\pm$  SEM). **(C)** Representative flow of FOXP3 expression after culture and **(D)** cumulative data of 4 independent experimental results showing maintained FOXP3<sup>+</sup> CD25<sup>+</sup> phenotype after 72 hours without IL-2 and/or anti-CD3/CD28 stimulation ( $n=4$ , mean  $\pm$  SEM). Paired  $t$  test;  $*P < .05$ ,  $**P < .01$ ,  $***P < .001$ ,  $****P < .0001$ . ns, not significant; FMO, fluorescence minus one; Mock, mock-engineered cells; rapa, rapamycin.

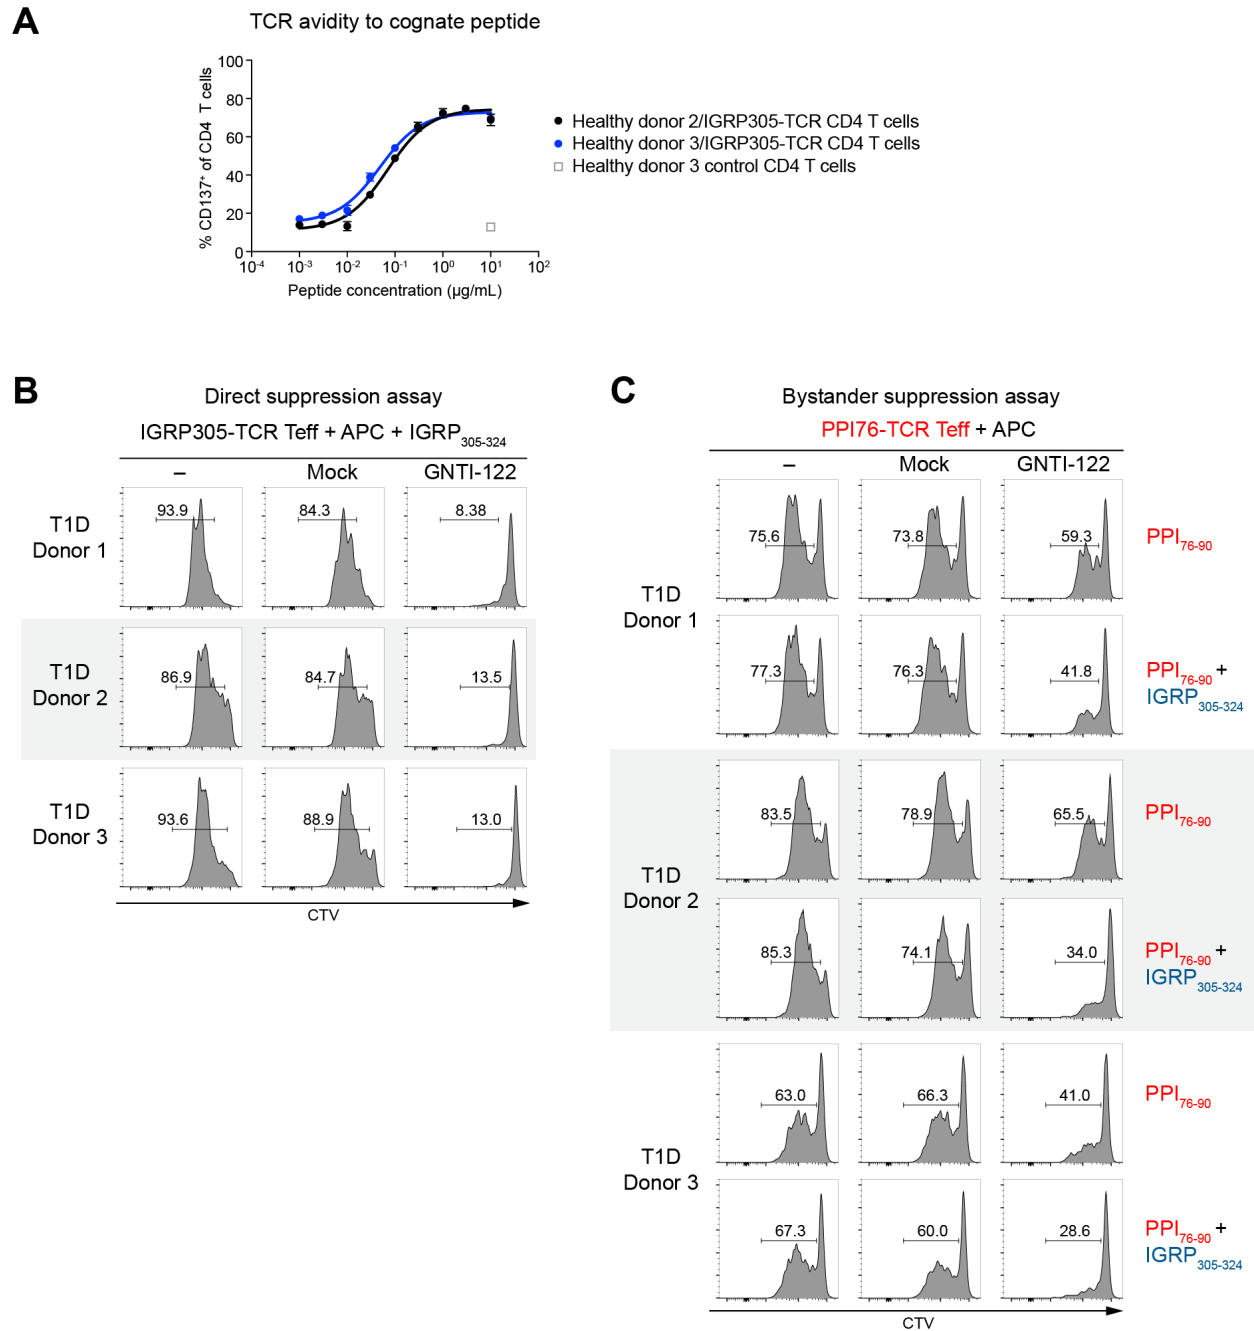

**Supplemental Figure 4. (A)** Sensitivity of IGRP305 T-cell receptor (TCR) for its cognate peptide in the assay system. K562 target cells expressing HLA-DR4 (K562/DR4) were pulsed with 0.001 to 10 µg/mL of the IGRP<sub>305-324</sub> peptide and cocultured with IGRP305-TCR transduced primary human CD4 T cells from 2 donors at 3:1 effector:target ratio. CD137 expression was measured after 20 hours. Near-maximal response is achieved with 1 µg/mL of peptide in this system. (mean ± SEM). **(B)** Individual flow cytometry plots of direct suppression assay. **(C)** Individual flow cytometry plots of the bystander suppression assay. Teff, T effector cells; APC, antigen-presenting cells; IGRP, islet-specific glucose-6-phosphatase catalytic subunit-related protein; Mock, mock-engineered cells; CTV, cell trace violet; PPI, preproinsulin

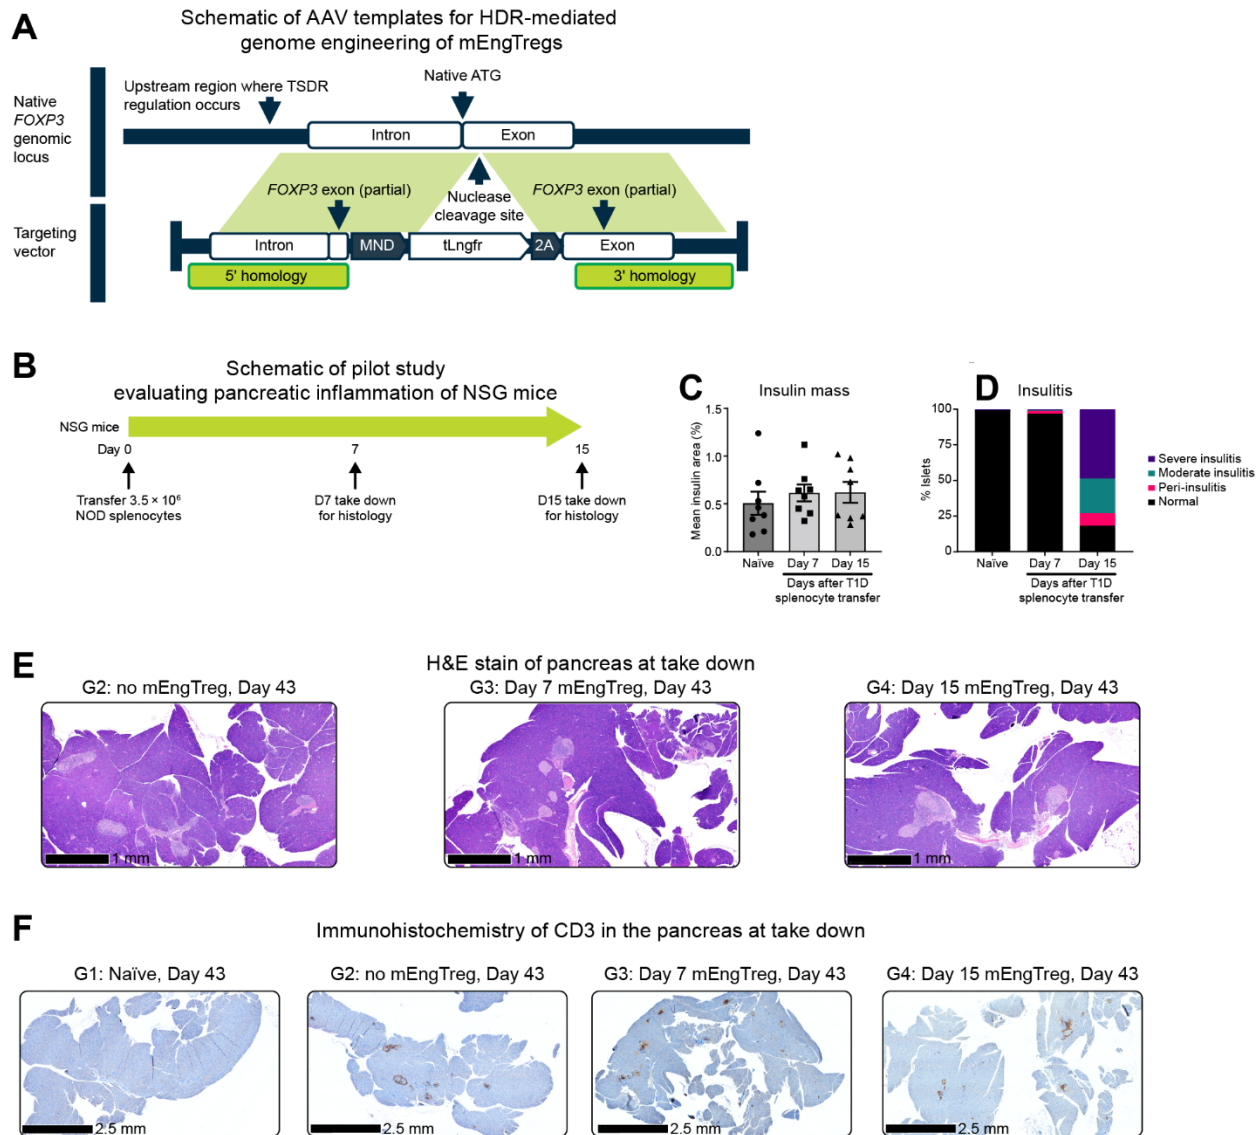

**Supplemental Figure 5.** (A) Schematic of AAV template and associated CRISPR/Cas9 target cleavage site for HDR-mediated targeted integration of the mEngTreg transgene. (B) Schematic diagram of the model development. (C) Quantification of beta cell mass by insulin staining of pancreata. Approximately 20 pancreatic islets quantified per mouse ( $n=8$ , mean  $\pm$  SEM). (D) Severity scores of pancreatic islet inflammation quantified via H&E staining. Representative (E) H&E-stained histology and (F) immunohistochemistry stain of CD3 of pancreas at take down (D43) for the study represented in **Figure 5G**. AAV, adeno-associated virus; HDR, homology-directed repair; mEngTregs, mouse Engineered Tregs; TSDR, Treg-specific demethylated region; ATG, start codon; tLngfr, truncated low-affinity nerve growth factor receptor.



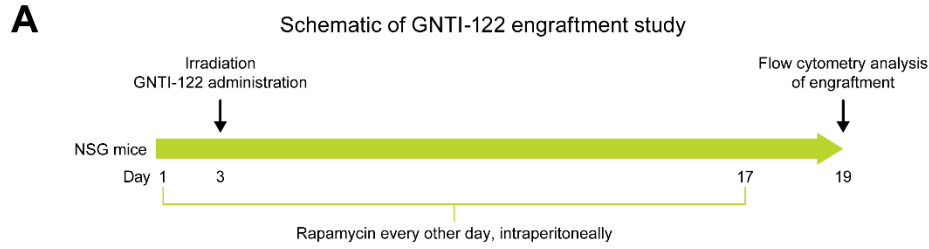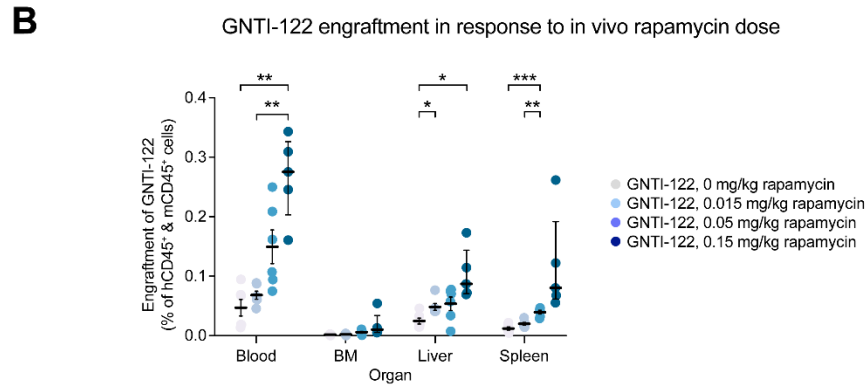

**C** Pharmacokinetic profile of rapamycin in whole mouse blood after first (day 1) and last (day 17) dose

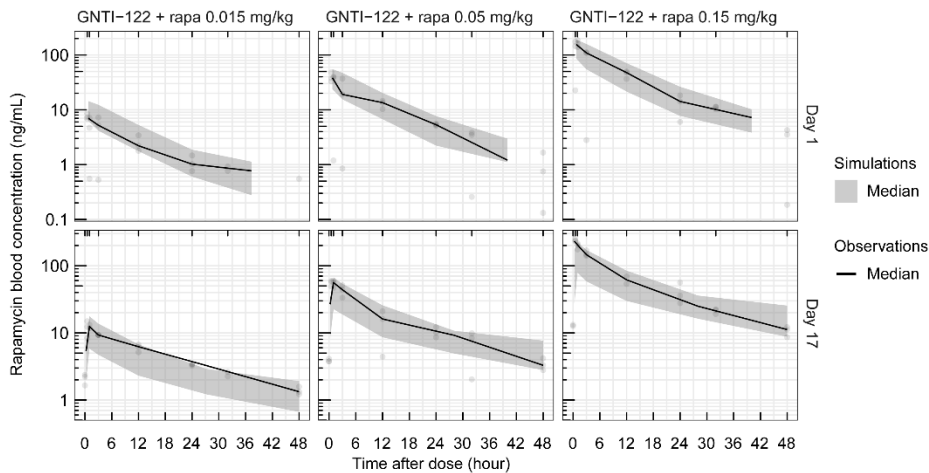

**D** Schematic overview of the selected in vitro GNTI-122 expansion and viability kinetics model in response to rapamycin exposure

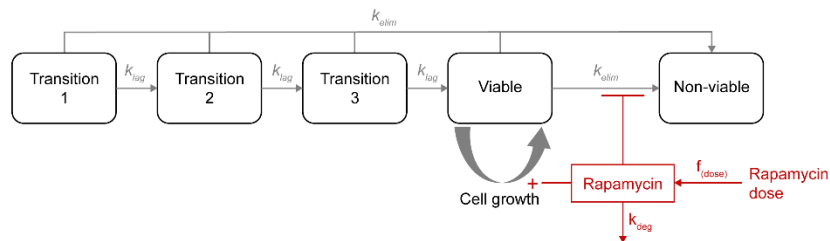

**Supplemental Figure 6.** (A), Schematic diagram of in vivo study assessing engraftment of GNTI-122 in NSG mice supported by rapamycin treatment. (B) Rapamycin administered every other day promoted GNTI-122 engraftment in a dose-dependent manner in blood, bone marrow, liver and spleen (n=5, mean

± SEM) 1-way ANOVA, \* $P < .05$ , \*\* $P < .01$ , \*\*\* $P < .001$ , \*\*\*\* $P < .0001$ . (C) The corresponding pharmacokinetic profiles of rapamycin in whole mouse blood after the first and last dose. Median measured values (line) and modelling based on 1000 simulations (gray area; median and 95% confidence interval). (D) Schematic overview of the selected model to describe in vitro cellular kinetics of GNTI-122 expansion and viability in response to rapamycin exposure. The model considers two GNTI-122 model species, i.e., viable (V) and non-viable (NV) cells. Viable cells undergo exponential expansion within a predefined time window in rapamycin-dependent manner in presence of TCR stimulation. The expansion process is assumed to take place after a delay at the start of the experiment, which is implemented via three transition compartments. Viable cells further transition towards nonviable cells; this process is inhibited in presence of rapamycin, independently of TCR stimulation. The rapamycin concentrations in the selected model are not constant but change over time since rapamycin in the media is further eliminated or metabolized following a first-order process with the rate constant  $k_{deg}$ . hCD45, human CD45; mCD45, mouse CD45; BM, bone marrow; rapa, rapamycin;  $K_{elim}$ , elimination constant;  $K_{lag}$ , transition rate constant of the cellular expansion process;  $F(dose)$ , rapamycin bioavailability;  $K_{deg}$ , degradation constant.

Expected rapamycin trough concentration ( $C_{\min}$ )  
at Day 14 in blood, by age and BSA

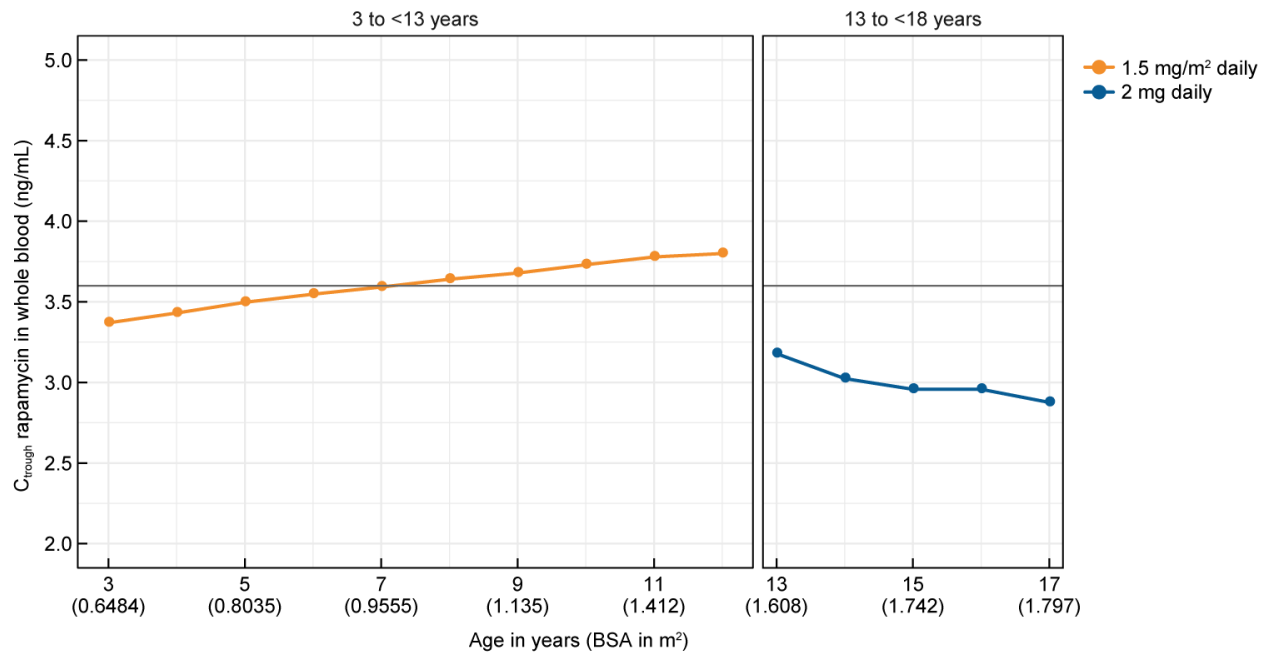

**Supplemental Figure 7. A model showing the changes in predicted pharmacokinetic profile of rapamycin with age in children and adolescents.**  $C_{\min}$  (minimal concentration of rapamycin before administration of the next daily dose) is shown on y-axis. Age and corresponding body surface area are shown on x-axis.

## Supplemental Tables

**Supplemental Table 1.** Cell surface markers

| <b>Marker</b>   | <b>Role/Function</b>                                                      |
|-----------------|---------------------------------------------------------------------------|
| TCRVb13.6       | IGRP305-TCR-specific TCRV $\beta$ domain                                  |
| CD3             | Pan T-cell marker; expressed on Tregs                                     |
| CD4             | T-cell subset marker; expressed on Tregs                                  |
| CD25            | IL-2 receptor alpha subunit; constitutively expressed on Tregs            |
| CD127           | Teff marker; downregulated on Tregs                                       |
| ICOS (CD278)    | Expressed on Tregs                                                        |
| CD39            | Ectonucleotidase that degrades ATP to AMP; expressed on Tregs             |
| CD73            | Ectonucleotidase that converts AMP to adenosine; expressed on Tregs       |
| FOXP3           | Transcription factor highly expressed in Tregs                            |
| CTLA-4 (CD152)  | CD80/86 agonist blocks binding to CD28 and DC's ability to activate Teffs |
| EOS             | Transcription factor stably expressed on Tregs                            |
| CD70            | Exhaustion marker of Tregs                                                |
| CD27            | TNF receptor superfamily that binds to CD70; expressed on Tregs           |
| GITR (CD357)    | TNF receptor superfamily; expressed on Tregs                              |
| TNFR1I (CD120b) | TNF receptor associated with activation and stability of Tregs            |
| 4-1BB (CD137)   | TNF receptor superfamily; expressed on activated Teffs and Tregs          |
| TIGIT (VSTM3)   | Co-inhibitory molecule expressed on a subset of Tregs                     |
| PD-1 (CD279)    | Expressed on activated T cells and negatively regulates activation        |
| LAG-3           | Ig superfamily expressed on activated T cells and Tregs                   |

**Supplemental Table 2.** Alanine mutant peptide sequences

|                         |                                         |
|-------------------------|-----------------------------------------|
| IGRP <sub>305-324</sub> | QLYHFLQIP <b>T</b> HEEHLYFVLS           |
| P1                      | QLYAFLQIP <b>T</b> HEEHLYFVLS           |
| P2                      | QLYH <b>A</b> LQIP <b>T</b> HEEHLYFVLS  |
| P3                      | QLYHF <b>A</b> QIP <b>T</b> HEEHLYFVLS  |
| P4                      | QLYHFL <b>A</b> IP <b>T</b> HEEHLYFVLS  |
| P5                      | QLYHFLQ <b>A</b> PT <b>T</b> HEEHLYFVLS |
| P6                      | QLYHFLQ <b>I</b> AT <b>T</b> HEEHLYFVLS |
| P7                      | QLYHFLQIP <b>A</b> HEEHLYFVLS           |
| P8                      | QLYHFLQIPT <b>A</b> EEHLYFVLS           |
| P9                      | QLYHFLQIP <b>T</b> H <b>A</b> EEHLYFVLS |
| P10                     | QLYHFLQIP <b>T</b> HE <b>A</b> HLYFVLS  |
| P11                     | QLYHFLQIP <b>T</b> HEE <b>A</b> LYFVLS  |

**Supplemental Table 3.** Pathogenic species with known risks to humans

| <b>Virus</b>                                                | <b>Bacteria</b>                                             | <b>Fungal</b>                | <b>Parasites</b>       |
|-------------------------------------------------------------|-------------------------------------------------------------|------------------------------|------------------------|
| HSV-1 and -2; Herpes simplex virus-1 and -2                 | Mycobacteria<br>- tuberculosis<br>- avium complex<br>others | Aspergillosis                | <i>Cryptosporidium</i> |
| CMV; Cytomegalovirus                                        | <i>Nocardia</i>                                             | Histoplasmosis               | Microsporida           |
| VZV; varicella-zoster virus                                 | <i>Listeria</i>                                             | Coccidioidomycosis           | Toxoplasmosis          |
| EBV; Epstein-Barr virus                                     | <i>Salmonella</i>                                           | Blastomycosis                | Strongyloidiasis       |
| HHV6; human herpes virus 6                                  | <i>Bartonella</i>                                           | Mucormycosis                 |                        |
| HHV8; human herpes virus 6                                  | <i>Neisseria gonorrhoeae</i>                                | <i>Candida</i>               |                        |
| HBV; hepatitis B virus                                      | <i>Streptococcus pneumoniae</i>                             | <i>Pneumocystis jiroveci</i> |                        |
| HCV; hepatitis C virus                                      | <i>Legionella pneumophila</i>                               |                              |                        |
| BK; polyomavirus hominus 1                                  | <i>Mycoplasma pneumoniae</i>                                |                              |                        |
| Adenovirus                                                  | <i>Staphylococcus aureus</i>                                |                              |                        |
| Molluscum                                                   | <i>Staphylococcus epidermidis</i>                           |                              |                        |
| HPV; human papilloma virus                                  | <i>Treponema pallidum</i> (syphilis)                        |                              |                        |
| JC; polyomavirus (PML)<br>John Cunningham virus             | <i>Chlamydia trachomatis</i>                                |                              |                        |
| SARS-CoV-2; severe acute respiratory syndrome coronavirus 2 |                                                             |                              |                        |
| Influenza A and B (most recent strains)                     |                                                             |                              |                        |
| HMPV; human metapneumovirus                                 |                                                             |                              |                        |
| RSV; respiratory syncytial virus                            |                                                             |                              |                        |
| HPIV; human parainfluenza virus                             |                                                             |                              |                        |

**Supplemental Table 4.** Putative IGRP<sub>305-324</sub> cross-reactive peptides

| Label       | Description                                                                                                             | Scientific Name                                 | 15 mer Sequence      | Risk to humans? |
|-------------|-------------------------------------------------------------------------------------------------------------------------|-------------------------------------------------|----------------------|-----------------|
| Pathogen 2  | TPA: phosphopentomutase                                                                                                 | <i>Legionella</i> sp.                           | SDSVLQIAAHEEHFG      | Yes             |
| Pathogen 5  | DUF4435 domain-containing protein                                                                                       | <i>Bacillus toyonensis</i>                      | YDEVLQIPTHQENTQ      | Yes             |
| Pathogen 9  | UDP-N-acetylglucosamine--N-acetylmuramyl-(pentapeptide) pyrophosphoryl-undecaprenol N-acetylglucosamine transferase     |                                                 | AASFLHIPYFTHECD      |                 |
| Pathogen 10 | TPA: UDP-N-acetylglucosamine-N-acetylmuramyl-(pentapeptide) pyrophosphoryl-undecaprenol N-acetylglucosamine transferase |                                                 | AARFLHIPYYTHECD      |                 |
| Pathogen 11 | undecaprenyldiphospho-muramoylpentapeptide beta-N-acetylglucosaminyltransferase                                         |                                                 | <i>Treponema</i> sp. |                 |
| Pathogen 12 | exodeoxyribonuclease V subunit beta                                                                                     | <i>Chlamydia caviae</i>                         | CSPFLQIPSYEPIEY      | Yes             |
| Pathogen 15 | hypothetical protein V495_01361                                                                                         | <i>Pseudogymnoascus</i> sp. VKM F-4514 (FW-929) | SAMFLDIPTHPPEHS      | Yes             |
| Pathogen 16 | hypothetical protein GX51_07420                                                                                         | <i>Blastomyces parvus</i>                       | KYEFLPIPTYEEATS      | Yes             |
| Pathogen 17 | hypothetical protein T551_03071                                                                                         | <i>Pneumocystis jiroveci</i> RU7                | FTDFLNIPSYEELND      | Yes             |
| Pathogen 18 | hypothetical protein KMI_05g09430                                                                                       | <i>Encephalitozoon hellem</i>                   | LSEFLKIPNHEITLL      | Yes             |
| Pathogen 19 | hypothetical protein ECU05_1220                                                                                         | <i>Encephalitozoon cuniculi</i> GB-M1           | QQKFLKNIDTHEEAE      | Yes             |
| Pathogen 20 | WD domain, G-beta repeat-containing protein                                                                             | <i>Toxoplasma gondii</i> ARI                    | ESLFLQLSTHTEASA      | Yes             |
| Pathogen 23 | ATP-dependent DNA helicase                                                                                              | <i>Legionella lansingensis</i>                  | DQLFLALPAHEERIS      | Yes             |

**Supplemental Table 5.** Healthy donor digital PCR primer probe sequences

| <b>Detection Primer/Probe</b> | <b>Sequence</b>       |
|-------------------------------|-----------------------|
| <i>FOXP3</i> F Primer         | CGGCGACGTGGAAGAGAATC  |
| <i>FOXP3-KI</i> R Primer      | GGCTGTGGTTCAGCCTGACT  |
| <i>FOXP3</i> FAM Probe        | AGGCTCTCCCCGACCTCCC   |
| <i>TRAC</i> F Primer          | TCTGTGCAGCAACCCGT     |
| <i>TRAC-KI</i> R Primer       | AGGGTTTTGGTGGCAATGGA  |
| <i>TRAC</i> FAM Probe         | CCTTCTCCCCAGCCCAGGT   |
| <i>GAPDH</i> F Primer         | TCATGCCTTCTTGCCTCTTGT |
| <i>GAPDH</i> R Primer         | TTGGATGAGAAAGGTGGGAGC |
| <i>GAPDH</i> HEX Probe        | CGTCGTGGAGTCCACTGG    |



**Supplemental Table 6.** T1D patient donor digital PCR primer probe sequences

| <b>Detection Primer/Probe</b> | <b>Sequence</b>         |
|-------------------------------|-------------------------|
| <i>FOXP3</i> F Primer         | CACTTCTCGCCTTCTCCACT    |
| <i>FOXP3-KI</i> R Primer      | CTGCTGTTCCAAGTGTCTTGG   |
| <i>FOXP3</i> HEX Probe        | CAGCATCATCACTTGCCAGGACT |
| <i>TRAC</i> F Primer          | GCTTAGACGCAGGTGTTCTGA   |
| <i>TRAC-KI</i> R Primer       | CTGCTGTTCCAAGTGTCTTGG   |
| <i>TRAC</i> FAM Probe         | CTGGCAAGTCACGGTCTCATGCT |
| <i>RPPHI</i> F Primer         | CTGGCCCTAGTCTCAGACCTT   |
| <i>RPPHI</i> R Primer         | GCGGAGGGAAGCTCATCAG     |
| <i>RPPHI</i> FAM/HEX Probe    | CCACGAGCTGAGTGCGTCTGT   |

**Supplemental Table 7.** Human antibody list

| Marker          | Clone    | Fluorophore | Marker localization | Manufacturer      | Cat No.         | Dilution |
|-----------------|----------|-------------|---------------------|-------------------|-----------------|----------|
| P2A             | 3HA      | AF488       | Intracellular       | Novus Biologicals | NBP2-59627AF488 | 1:100    |
| TCRVb13.6       | REA554   | PE          | Surface             | Miltenyi Biotec   | 130-126-523     | 1:50     |
| CD3             | UCHT1    | APC-Cy7     | Surface             | BioLegend         | 300426          | 1:200    |
| CD4             | RPA-T4   | AF700       | Surface             | BioLegend         | 300526          | 1:500    |
| CD4             | OKT4     | BV711       | Surface             | BioLegend         | 317440          | 1:200    |
| CD25            | 2A3      | BV605       | Surface             | BD Biosciences    | 562660          | 1:100    |
| CD25            | BC96     | APC         | Surface             | BioLegend         | 302610          | 1:100    |
| CD127           | A019D5   | PeCy7       | Surface             | BioLegend         | 351320          | 1:200    |
| CD127           | A019D5   | BV605       | Surface             | BioLegend         | 351334          | 1:100    |
| ICOS (CD278)    | C398.4A  | BV421       | Surface             | BioLegend         | 313524          | 1:100    |
| ICOS (CD278)    | C398.4A  | PerCP Cy5.5 | Surface             | BioLegend         | 313518          | 1:200    |
| CD39            | TU66     | BV711       | Surface             | BD Biosciences    | 563680          | 1:200    |
| CD73            | AD2      | BV785       | Surface             | BioLegend         | 344028          | 1:100    |
| FOXP3           | 259D     | AF488       | Intracellular       | BioLegend         | 320212          | 1:100    |
| FOXP3           | PCH101   | PeCy7       | Intracellular       | Invitrogen        | 25-4776-4       | 1:100    |
| CTLA-4 (CD152)  | L3D10    | APC         | Intracellular       | BioLegend         | 349908          | 1:200    |
| CTLA-4 (CD152)  | BNI3     | BV785       | Intracellular       | BioLegend         | 369624          | 1:50     |
| EOS             | W16032 A | APC         | Intracellular       | BioLegend         | 399306          | 1:100    |
| CD70            | 113-16   | PeCy7       | Surface             | BioLegend         | 355112          | 1:100    |
| CD27            | O323     | BV650       | Surface             | BioLegend         | 302828          | 1:50     |
| GITR (CD357)    | 108-17   | BV605       | Surface             | BioLegend         | 371214          | 1:200    |
| TNFRII (CD120b) | 3G7A02   | APC         | Surface             | BioLegend         | 358406          | 1:100    |
| 4-1BB           | 4B4-1    | PeCy7       | Surface             | BioLegend         | 309818          | 1:100    |

| <b>Marker</b> | <b>Clone</b> | <b>Fluorophore</b> | <b>Marker localization</b> | <b>Manufacturer</b> | <b>Cat No.</b> | <b>Dilution</b> |
|---------------|--------------|--------------------|----------------------------|---------------------|----------------|-----------------|
| TIGIT (VSTM3) | A15153G      | BV421              | Surface                    | BioLegend           | 372709         | 1:50            |
| PD-1          | EH12.2H7     | BV650              | Surface                    | BioLegend           | 329950         | 1:100           |
| LAG-3         | 11C3C65      | BV785              | Intracellular              | BioLegend           | 369322         | 1:100           |
| IL-2          | MQ1-17H12    | PeCy7              | Intracellular              | BioLegend           | 500326         | 1:25            |
| IFNg          | 4S.B3        | AF647              | Intracellular              | BioLegend           | 502516         | 1:25            |
| LAP           | S20006A      | PeCy7              | Surface                    | BioLegend           | 300007         | 1:20            |
| GARP          | 7B11         | BV421              | Surface                    | BD Biosciences      | 563956         | 1:50            |

**Supplemental Table 8. Mouse antibody list**

| <b>Marker</b> | <b>Clone</b> | <b>Fluorophore</b>         | <b>Marker localization</b> | <b>Manufacturer</b> | <b>Cat No.</b> | <b>Dilution</b> |
|---------------|--------------|----------------------------|----------------------------|---------------------|----------------|-----------------|
| Lngfr         | REA648       | PE                         | Surface                    | Miltenyi Biotec     | 130-118-793    | 1:100           |
| CD4           | GK1.5        | BV605                      | Surface                    | BioLegend           | 100451         | 1:200           |
| Foxp3         | FJK-16S      | PerCP-Cy5.5                | Intracellular              | Invitrogen          | 45-5773-82     | 1:50            |
| Helios        | 22F6         | PE-Cy7                     | Surface                    | BioLegend           | 137235         | 1:50            |
| CD45          | 30-F11       | FITC                       | Surface                    | BioLegend           | 103121         | 1:200           |
| CD8a          | 53-6.7       | BV650                      | Surface                    | BioLegend           | 100741         | 1:200           |
| CD62L         | MEL-14       | SB780                      | Surface                    | Invitrogen          | 78-0621-82     | 1:200           |
| CD44          | IM7          | AF780                      | Surface                    | Invitrogen          | 25-0441-82     | 1:200           |
| CD3           | 17A2         | Pacific Blue               | Surface                    | Invitrogen          | 14-0032-82     | 1:200           |
| vB4           | REA729       | APC                        | Surface                    | Miltenyi Biotec     | 130-110-982    | 1:200           |
| LIVE/DEAD     | N/A          | Invitrogen<br>Fixable Aqua | Intracellular              | Invitrogen          | L34966         | 1:1000          |

## Supplemental References

1. Zarin P, et al. Treg cells require Izumo1R to regulate gammadeltaT cell-driven inflammation in the skin. *Proc Natl Acad Sci U S A*. 2023;120(14):e2221255120.
2. Dobin A, et al. STAR: ultrafast universal RNA-seq aligner. *Bioinformatics*. 2013;29(1):15–21.
3. Patro R, et al. Salmon provides fast and bias-aware quantification of transcript expression. *Nat Methods*. 2017;14(4):417–419.
4. Zemmour D, et al. Single-cell gene expression reveals a landscape of regulatory T cell phenotypes shaped by the TCR. *Nat Immunol*. 2018;19(3):291–301.
5. Yang SJ, et al. Pancreatic islet-specific engineered Tregs exhibit robust antigen-specific and bystander immune suppression in type 1 diabetes models. *Sci Transl Med*. 2022;14(665):eabn1716.
6. Rossjohn J, et al. T cell antigen receptor recognition of antigen-presenting molecules. *Annu Rev Immunol*. 2015;33:169-200.
